# Supplementary material for: Evolution of Therapeutic Patient Education: A Systematic Scoping Review and Scientometric Analysis
Source: Preprints.org preprint supplement (doi:10.20944/preprints202203.0131.v1), 2022-03-09
Supplement: Supplementary file 3 [file supplementary]

(listing pending)
